# Supplementary material for: Lactation opposes pappalysin‐1‐driven pregnancy‐associated breast cancer
Source: PubMed Central journal article supplement (PMC4818749; doi:10.15252/emmm.201606273), 2016-03-08

C

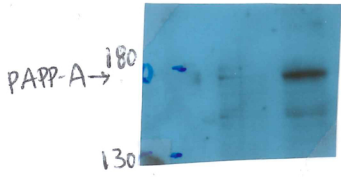

D

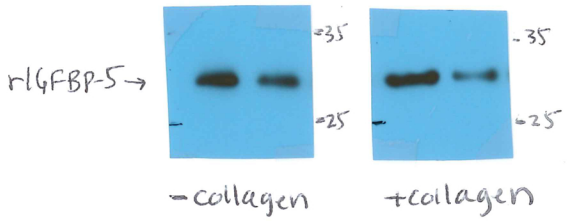

E

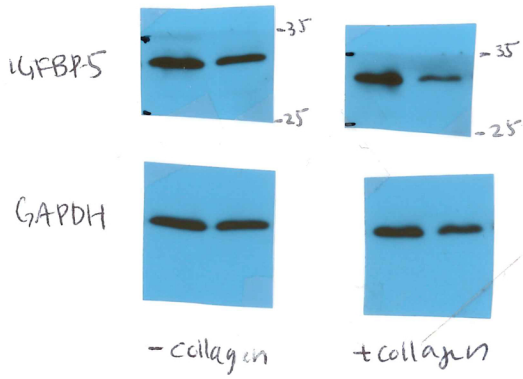

G

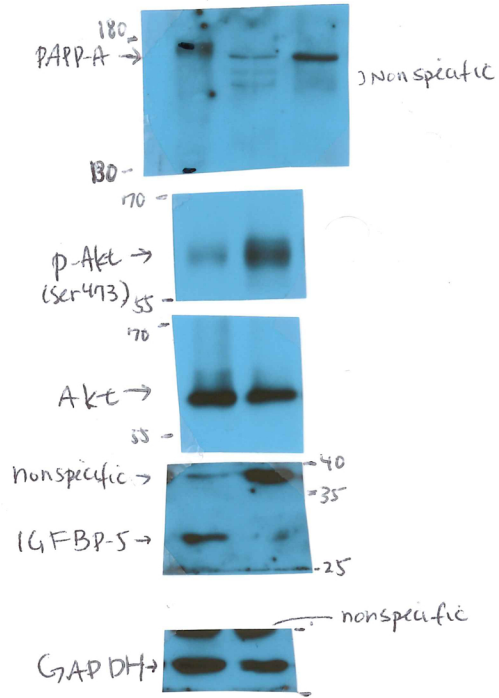

Supplementary 4

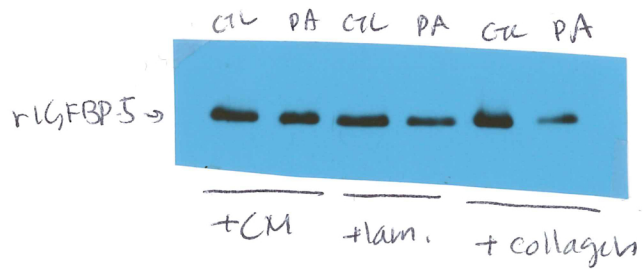

Supplement: EMMM-8-388-s003.pdf [file EMMM-8-388-s003.pdf]
