# Supplementary material for: Lactation opposes pappalysin‐1‐driven pregnancy‐associated breast cancer
Source: PubMed Central journal article supplement (PMC4818749; doi:10.15252/emmm.201606273), 2016-03-08

Figure 6

G

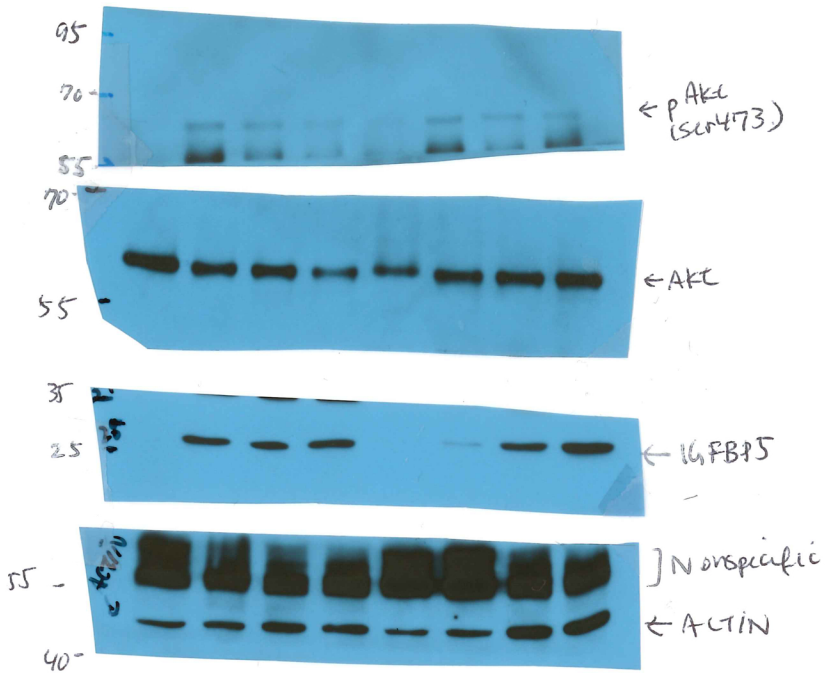

J

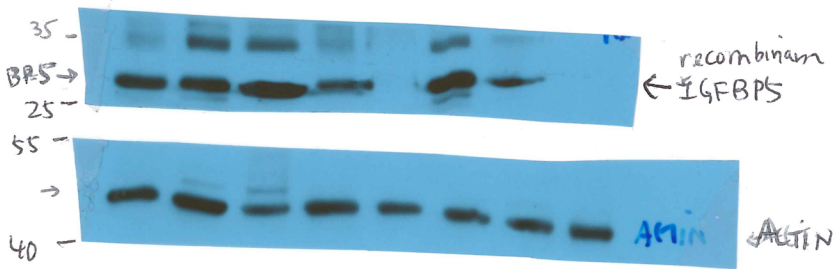

Sup Fig. 7B

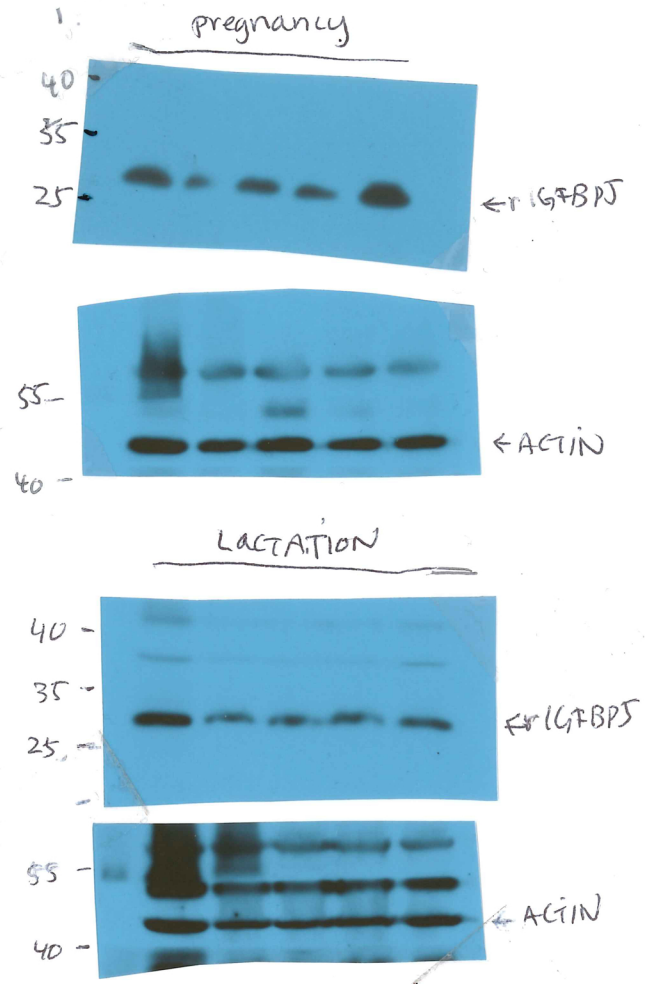

Sup Fig. 7D

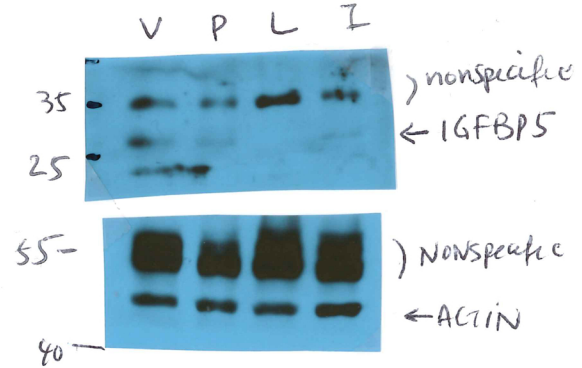

Figure 6

H

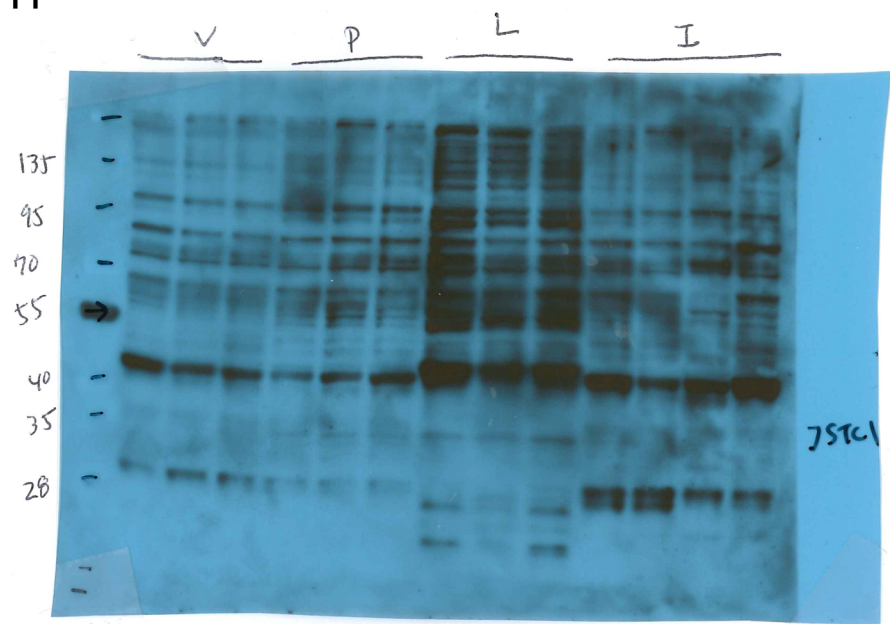

21

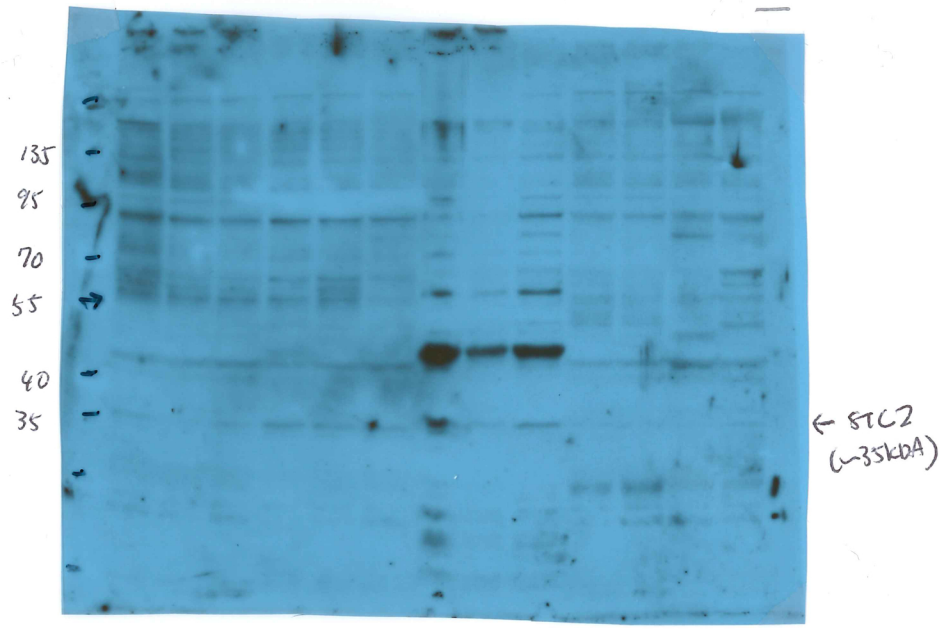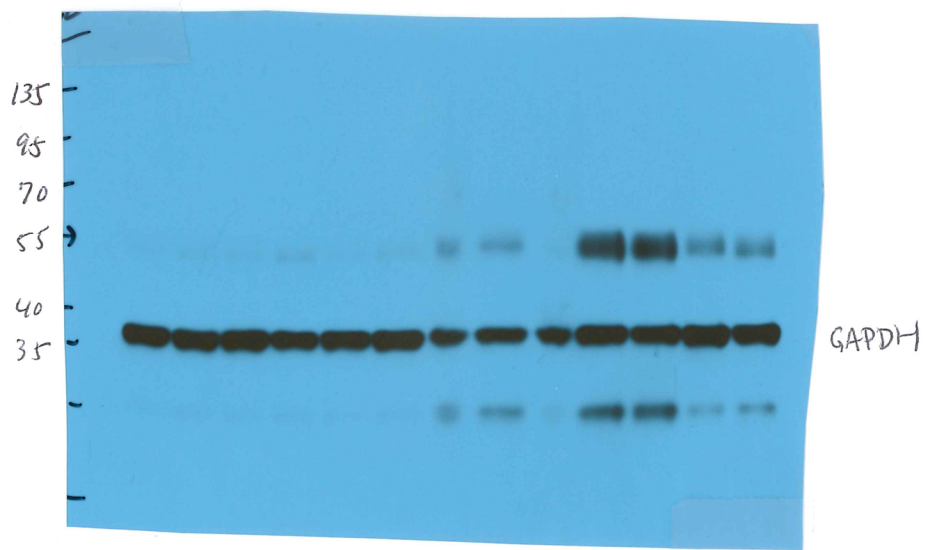

Supplement: EMMM-8-388-s005.pdf [file EMMM-8-388-s005.pdf]
